1 **Development of an orally-administrable tumor vasculature-**  
2 **targeting therapeutic using annexin A1-binding D-peptides**

3

4 Motohiro Nonaka<sup>1,2</sup>, Hideaki Mabashi-Asazuma<sup>3</sup>, Donald L. Jarvis<sup>3</sup>, Kazuhiko Yamasaki<sup>4</sup>, Tomoya  
5 O. Akama<sup>5</sup>, Masato Nagaoka<sup>6</sup>, Toshio Sasaki<sup>6</sup>, Itsuko Kimura-Takagi<sup>6</sup>, Yoichi Suwa<sup>6</sup>, Takashi  
6 Yaegashi<sup>6</sup>, Chun-Ten Huang<sup>7</sup>, Chizuko Nishizawa-Harada<sup>1</sup>, and Michiko N. Fukuda<sup>1,7,#</sup>

7

8 <sup>1</sup>Laboratory for Drug Discovery, National Institute of Advanced Industrial Science and Technology,  
9 Tsukuba, Ibaraki 305-8568, Japan.

10 <sup>2</sup>Department of Biological Chemistry, Human Health Sciences, Graduate School of  
11 Medicine, Kyoto University, Kyoto, 606-8507, Japan.

12 <sup>3</sup>Department of Molecular Biology, University of Wyoming, Laramie, WY 82071, USA.

13 <sup>4</sup>Biomedical Research Institute, National Institute of Advanced Industrial Science and Technology,  
14 Tsukuba, Ibaraki 305-8566, Japan.

15 <sup>5</sup>Department of Pharmacology, Kansai Medical University, Hirakata, Osaka 573-1010, Japan.

16 <sup>6</sup>Yakult Central Institute, Kunitachi, Tokyo 186-8650, Japan.

17 <sup>7</sup>Cancer Center, Sanford-Burnham-Prebys Medical Discovery Institute, La Jolla, CA 92037, USA.

18

19 # Corresponding authors: Michiko N. Fukuda, E-mail: [michiko@sbpdiscovery.org](mailto:michiko@sbpdiscovery.org)

20

21

22

## 23 **ABSTRACT**

24 **IF7 peptide, which binds to the annexin A1 (ANXA1) N-terminal domain, functions as a**  
25 **tumor vasculature-targeted drug delivery vehicle after intravenous injection. To enhance IF7**  
26 **stability *in vivo*, we undertook mirror-image peptide phage display using a synthetic D-peptide**  
27 **representing the Anxa1 N-terminus as target. Peptide sequences were identified, synthesized as**  
28 **D-amino acids, and designated as dTIT7, which was shown to bind the ANXA1 N-terminus.**  
29 **Whole body imaging of mouse brain tumors modeled with near infrared fluorescent IRDye-**  
30 **conjugated dTIT7 showed fluorescent signals in brain and kidney. Furthermore, orally-**  
31 **administered geldanamycin (GA)-conjugated dTIT7 suppressed brain tumor growth. Ours is a**  
32 **proof-of-concept experiment showing that Anxa1-binding D-peptide could be developed as an**  
33 **orally-administrable, tumor vasculature-targeted therapeutic.**

34

35 Role of each author: MN designed and performed experiments, analyzed data, and wrote the  
36 manuscript; HMA and DLJ produced recombinant ANXA1 protein; KY conducted NMR analysis  
37 and data analysis; TOA designed, performed and analyzed LC-MS/MS data; MN, TS, IKT, YS, and  
38 TY analyzed peptide-binding assays and performed in silico structural analysis; CTU produced  
39 lentivirus for luciferase expression; CNH performed peptide binding assays, tissue culture and animal  
40 experiments; and MNF supervised the project and wrote the manuscript.

41

42

43

44

## 45 **Introduction**

46 It is widely accepted that vasculature surfaces are heterogenous and express varying tissue-  
47 specific receptors under different pathological conditions [1]. Targeted-drug delivery to a disease-  
48 specific receptor on the endothelial cell surface could enable high therapeutic efficacy with minimum  
49 side effects. In order to enable drug delivery through intravenous route, it is essential to identify  
50 specific vasculature surface markers. Oh *et al.*, used subtractive proteomics analysis of malignant vs.  
51 normal vasculature to identify Annexin A1 (ANXA1) as highly specific surface marker of malignant  
52 tumor vasculature [2, 3]. Coincidentally we found a linear 7-mer peptide IFLLWQR (IF7) that binds  
53 the ANXA1 N-terminus [4-6]. Upon intravenous injection into tumor-bearing mice, a conjugate of  
54 IF7 with the anti-cancer drug geldanamycin (GA) suppressed growth of prostate, breast, melanoma  
55 and lung tumors, and IF7-conjugated SN-38 suppressed colon cancer growth in mice at low dose  
56 without side effects [5]. Moreover, intravenously-injected IF7 accumulated on the tumor endothelial  
57 cell surface, was endocytosed into vesicles, and crossed tumor endothelial cells by transcytosis [5].  
58 Thus we hypothesized that an IF7-conjugated drug would overcome the blood-brain-barrier (BBB) to  
59 eradicate brain tumors. Indeed, intravenous injection of the IF7-conjugated anti-tumor agent SN-38  
60 into model mice harboring brain tumors efficiently reduced the size of brain tumor at low dosage,  
61 which apparently invoke host immune reaction against brain tumor leading into complete remission  
62 of brain tumor [6].

63

64 We conjugated IF7 to SN-38 through an esterase-cleavable linker, allowing SN-38 to be freed  
65 from the peptide once it reached the tumor vasculature. IF7 peptide itself was also susceptible to  
66 proteases. These properties of IF7-SN38 compromises its stability *in vivo* [5].

67

68 Here, to construct a protease-resistant form of IF7 that retains ANXA1-binding activity, we

69 undertook mirror-image phage library screening taking an advantage of the fact that IF7 binds to  
70 chemically synthesized ANXA1 N-terminal domain (1-15 residues plus additional cysteine at 16),  
71 designated as MC16 [6]. This phage library screening identified the peptide dTIT7, which represents  
72 an ANXA1-binding D-type peptide. We then conjugated it to geldanamycin (GA) through an  
73 uncleavable linker to generate GA-dTIT7. We present proof-of-concept data showing that orally-  
74 administered GA-dTIT7 suppresses brain tumor growth in mice.

75

## 76 **Materials and Methods**

77 *Materials.* Unless noted, peptides used here, including the D-type peptides dTIT7, dLRF7,  
78 dSPT7, dLKG7 and dLLS7, were synthesized by GenScript (Piscataway, NJ). D-MC16 and L-MC16  
79 peptides, with human 15 N-terminal ANXA1 residues plus a cysteine residue at 16 position  
80 (MAMVSEFLKQAWFIEC) and L-MC16 mutants were synthesized by Bio-Synthesis (Lewisville,  
81 TX). *IsodTIT7*, in which prolines contain  $^{13}\text{C}$  and  $^{15}\text{N}$ , were synthesized by Peptide Institute, Osaka,  
82 Japan.

83

84 *Mirror-image phage library screening.* Library screening strategies [7, 8] were adapted to  
85 identify a peptide sequence binding the ANXA1 N-terminal domain. D-MC16 peptide (described  
86 above) was chemically synthesized as D-amino acids, dissolved in DMSO, and used to coat  
87 maleimide-activated plates (Corning) at 10 nmol/well at 4°C for 20 hours. After blocking with  
88 SuperBlock solution (Thermo), screening was performed using a T7 phage library comprised of fully  
89 random 7-mer peptides, provided by Dr. E. Ruoslahti, Sanford-Burnham-Prebys Medical Discovery  
90 Institute (SBP). The phage peptide sequence was determined using an Ion Torrent Next Generation  
91 sequencer (Thermo). Top-ranked sequences TITWPTM or dTIT7 and the next four high-ranking  
92 peptides were then chemically synthesized using D-amino acids.

93

94 *Cell lines.* PGK-Luc lentiviral vector was produced at the Virus Core Facility of SBP. Rat  
95 glioma C6 and mouse melanoma B16F1 cells were infected with lentivirus harboring firefly  
96 luciferase, to produce C6-Luc and B16F1-Luc lines [5, 6]. Lines were cultured in Dulbecco's-  
97 Modified Eagle + F2 medium supplemented with 10% fetal bovine serum and 100 units each/mL  
98 penicillin and streptomycin, at 37C in a humidified 5% CO<sub>2</sub> incubator.

99

100 *Binding of biotinylated D-peptides to L-MC16.* To assess dTIT7 binding, wells of Sulphydryl-  
101 BIND Surface Maleimide plates (Corning) were coated 20 hours with wild type (WT) and mutant L-  
102 MC16 in water at 4°C. After washing with PBS containing 0.02% Tween 20 (PBST), wells were  
103 blocked 1 hour with 10% superblock (Thermo) in PBST at room temperature. Biotinylated dTIT7 (10  
104 µg dissolved in 10% superblock in PBST (1 mL) was added to each well at 100 µl/well prepared as  
105 above and incubated 30 min at room temperature for. After three PBST washes, 100 µl streptavidin-  
106 peroxidase (0.2 µg/ml) in 10% superblock in PBST containing 2% bovine serum albumin was added  
107 to each well and incubated 30 min. After three PBST washes, 100 µL of the peroxidase substrate one-  
108 step-TMB (Thermo) was added and incubated until the color developed. The reaction was stopped by  
109 adding 100 µl 2N sulfuric acid, and absorbance at 450 nm monitored using an ELISA plate reader.

110

111 *In silico conformational analysis of the ANXA1 N-terminus and dTIT7 docking.* ANXA1  
112 coordinates were obtained from the protein data bank (PDB). Both 1HM6 and 1MCX structures were  
113 derived from pig Anxa1 (89.6% sequence identity to human ANXA1 (Accession: P04083)). For the  
114 protein-protein docking structure of ANXA1, N-terminal free ANXA1 was built using MOE  
115 (Molecular Operating Environment) software ver. 2010.10 (Chemical Computing group). To obtain  
116 the dimer structure of ANXA1 with a free N-terminus, we used ZDOCK ver. 3.0.1 [9], which uses a  
117 Fast Fourier Transform-based algorithm to analyze proteins as rigid bodies during docking, searches  
118 for all possible binding orientations of a ligand along the receptor protein surface and provides

119 docking poses ranked by Zdock scores associated with shape complementarity, desolvation and  
120 electrostatic properties. Hydrogen atoms of ANXA1 dimers calculated from Zdock were minimized  
121 using the AMBER99 force field.

122

123 *Preparation of recombinant ANXA1 protein.* Recombinant, full-length ANXA1 was  
124 expressed using the baculovirus expression system [10], as described [6, 10]. Briefly, baculoviruses  
125 were prepared by recombining BacPAK6 $\Delta$ chi/cath baculovirus DNA with pAcP(-)-based baculovirus  
126 transfer vectors, which encode the transgene controlled by the baculovirus *p6.9* promoter.  
127 Recombinant ANXA1 protein harbored an N-terminal honeybee melittin signal peptide followed by a  
128 His<sub>8</sub>-tag and the enterokinase recognition sequence, DDDDR. Proteins were purified from Sf9 culture  
129 supernatants harvested 42 hours after infection using HisPur Ni-NTA resin (Pierce). Untagged  
130 ANXA1 was isolated by His-tagged enterokinase (Genscript) treatment followed by Ni-affinity  
131 chromatography. Protein concentration was determined using the BCA protein assay kit (Pierce).

132

133 *NMR Measurements.* NMR was measured in solutions consisted of 50  $\mu$ M peptide(s), 10 mM  
134 d<sub>11</sub>-Tris-HCl (pH 7.5) (Isotec Inc., IL), 150 mM NaCl, 1 mM d<sub>10</sub>-dithiothreitol (DTT) (Isotec Inc.,  
135 IL), 0.1 mM sodium 2,2-dimethyl-2-silapentane-5-sulfonate (DSS), and 5% D<sub>2</sub>O. NMR spectra were  
136 recorded at 298 K on a Bruker (Germany) Avance III-500 spectrometer (<sup>1</sup>H frequency: 500.13 MHz).  
137 Chemical shifts were referenced to the peak of internal DSS. Relaxation time  $T_2$  was measured using  
138 the Carr-Purcell-Meiboom-Gill sequence and analyzed with the Topspin 3.2 program (Bruker). Error  
139 levels were estimated by four repeated experiments.

140

141 *Vertebrate animal use.* Mouse protocols adhered to the NIH Guide for the Care and Use of  
142 Laboratory Animals and were approved by Institutional Review Committees at National Institute of  
143 Advanced Industrial Science and Technology (AIST) and Kyoto University School of Medicine in  
144 Japan. Experiments of brain tumor model mouse were conducted when tumor size determined as

145 photon number was between  $1 \times 10^4$  and  $1 \times 10^7$ . When brain tumor grew more than  $1 \times 10^7$ , the  
146 mouse was euthanized by placing the animal under saturated isoflurane gas (1~2 mL isoflurane in 250  
147 mL chamber) followed by cervical dislocation. No animal died before meeting the criteria for  
148 euthanasia.

149

150 *Generation of brain tumor model mice.* C6-Luc cells ( $4.8 \times 10^4$  in 4  $\mu$ l PBS) were injected  
151 into C57BL/6 mouse brain striatum using a stereotaxic frame as described [11]. Seven days later,  
152 mice underwent imaging for luciferase-expressing tumors. To do so, 100 $\mu$ l luciferin (30 mg/ml PBS)  
153 was injected peritoneally, and then mice were anesthetized under isoflurane gas (20 ml/min)  
154 supplemented with oxygen (1 ml/min) and placed under a camera equipped with a Xenogen IVIS 200  
155 imager at AIST animal facility. Photon numbers were measured for 1-10 sec or for 1 min.

156

157 *Near infra-red fluorescence whole body imaging.* Each 7-mer D-peptide with an N-terminal  
158 cysteine was synthesized by GenScript (Piscataway, NJ). Peptides were conjugated with IRDye  
159 800CW maleimide (Li-Cor) through the cysteine residue at room temperature for 2 hours according  
160 to the manufacturer's instruction. After reverse-phase HPLC purification, the conjugate was dissolved  
161 in DMSO and 6% glucose to a final concentration of 0.2  $\mu$ M. The C6-Luc brain tumor model mouse  
162 was generated in nude mice as described above. When photon number reached  $5 \times 10^4$ , each IRDye-  
163 conjugated D-peptide (100  $\mu$ l) was injected intravenously through the tail vein. Near infra-red  
164 fluorescence in the mouse was monitored at 15 min after injection using an IVIS system and daily  
165 over 6 days.

166

167 *Conjugation of dTIT7 with a geldanamycin analogue.* Procedures of Mandler *et al.* [12]  
168 were modified as follows. Geldanamycin (GA, 100 mg) was dissolved in chloroform (18 mL). 1,  
169 3-diaminopropane (APA, 50  $\mu$ l, molar ratio x 3.3 eq to GA) was also dissolved in chloroform (2

170 mL). APA solution was added slowly to GA and reacted at ambient temperature under argon gas for  
171 20 hours. Hexane (100 mL) was then added slowly to precipitate a purple product (17-APA-GA or  
172 17-DMAG), which was filtered through a glass filter. The precipitate was solubilized in chloroform  
173 (30 mL) and conjugated immediately to *N*-maleimidobutyl oxysuccinimide ester (GMBS, 100 mg)  
174 dissolved in chloroform (10 mL) and left at ambient temperature for 60 min under argon gas. The  
175 mixture was then concentrated on a rotary evaporator and applied to silica gel for thin layer  
176 chromatography with a solvent system of chloroform: methanol (9:1, v/v). A purple band  
177 representing GMB-APA-GA was isolated and extracted from the gel with methanol. GMB-APA-GA  
178 was further purified by C18 reverse phase HPLC with an acetonitrile gradient from 40-80% in water  
179 containing 0.1% trifluoro acetic acid. HPLC-purified GMB-APA-GA was dissolved in methanol (10  
180 mL), and C-dTIT7 peptide (equimolar to GMB-APA-GA) was also dissolved in methanol (10 mL).  
181 Both were mixed at ambient temperature for 20 hours under argon gas. The product GA-dTIT7  
182 (1719.52 Da) was purified by HPLC. GA-dTIT7 structure was validated by MALDI TOF-MS.  
183 Control GA-C (893.44 Da), GA-conjugated with cysteine only, was similarly prepared.

184 *LC-MS/MS analysis of GA-dTIT7 in mouse serum.* C57BL/6 mice (8 week-old females)  
185 (n=6) were fasted overnight and then placed under isoflurane gas and administered a single dose of  
186 GA-dTIT7 (1 mg) dissolved with 10% taurodeoxycholate in water (200  $\mu$ L) via oral gavage. Blood  
187 (50  $\mu$ L) was collected from the facial vein at 0 min (pre-dose), 30 min, 60 min, 90 min and 120 min  
188 after administration using a lancet and placed into sodium heparin for plasma preparation. Then 1  
189  $\mu$ L *iso*-GA-dTIT7 (1 mg/mL in dimethylsulfoxide) was added as an internal standard to 9  $\mu$ L  
190 plasma. After addition of cold acetone (40  $\mu$ L), each sample was centrifuged to remove precipitates  
191 and an aliquot of supernatant was injected into an LC-MS/MS spectrometer.

192 *Oral administration of GA-dTIT7 to brain tumor-bearing mice.* When photon numbers of  
193 B16-Luc or C6-Luc brain tumors reached  $5 \times 10^4$ , oral administration of GA-dTIT7 or control GA-C  
194 was initiated. GA-dTIT7 (1719.52 Da, 2.0 mg) or GA-C (893.44 Da, 1.0 mg) was dissolved in 10  $\mu$ L



195 DMSO and diluted with 200  $\mu$ L 10% taurodeoxycholate in water and then orally administered using a  
196 gavage.

197

198 *Statistical analysis.* Statistical analyses were performed using GraphPad Prism program. Data  
199 sets were compared using Student's unpaired *t*-test (two-tailed). A *p* value  $\leq 0.05$  was considered  
200 significant.

201

202

## 203 **Results**

204 **Identification of linear 7-mer D-peptides by a mirror-image phage display screen.** We showed  
205 previously that IF7 binds the Anxa1 N-terminal domain and that a chemically synthesized peptide  
206 representing this domain (designated MC16) was sufficient for IF7 binding [5, 6]. Here, we  
207 undertook mirror-image phage library screening for a protease-resistant D-type version of IF7 using  
208 synthetic D-MC16 peptide as target (Fig. 1A). This procedure resulted in enrichment for several  
209 phage clones (Fig. 1BCD), many showing a TITWPTM motif based on deep sequencing  
210 (Supplemental Table 1). We designated TITWPTM as TIT7 and a synthetic peptide of TIT7  
211 composed of D-amino acids as dTIT7.

## 212 **Fig. 1**

213

214 **Binding of dTIT7 to MC16 and ANXA1 *in vitro*.** Since interaction of dTIT7 to ANXA1 N-  
215 terminal domain including MC16 likely occurs when MC16 is localized to the cell membrane, we  
216 mimicked this state by coating plastic plates with MC16 peptide and then adding a solution  
217 containing biotinylated dTIT7 to the plates. High levels of dTIT7 bound to WT MC16 in this context,  
218 with a *K<sub>d</sub>* of 8.5 nM (Fig. 2A). We then assessed specificity of TIT7 binding to MC16 in a binding

219 assay using mutant forms of MC16. That analysis indicated that dTIT7 binding affinity to MC16  
220 mutants F7A, K9A and W11A was significantly lower than to WT MC16 (Fig. 2B).

221

222 We then assessed binding of full-length ANXA1 to immobilized dTIT7 by QCM analysis, which  
223 indicated a  $K_d$  of  $4.66 \times 10^{-8}$  M with ANXA1 (Fig. 2C), a value comparable to that for IF7 with  
224 ANXA1 ( $6.38 \times 10^{-8}$  M) [6]. QCM analysis of additional D-peptides identified in our screen  
225 (namely, d-LRF7, dSPT7, dMPT7 and dLLS7) with ANXA1 showed  $K_d$  values, ranging from  $3-9 \times$   
226  $10^{-8}$  M (Fig. 2D), confirming that affinity of these peptides to ANXA1 was comparable to dTIT7 or  
227 IF7.

## 228 Fig. 2

229 To confirm that dTIT7 and MC16 interact in solution, we analyzed a mixture of both peptides  
230 using NMR spectroscopy (Fig. 3A). We observed that the spectrum of the mixture was similar but  
231 differed in key ways from the sum of respective peptides. Most prominently, a distinct peak in the  
232 mixture spectrum emerged at 0.73 ppm (Fig. 3A, black arrow) and was absent in the summed  
233 spectrum. Concomitantly, we observed relative broadening of many peaks of the mixture spectrum.  
234 Note that a split in the peak at 1.08 ppm (Fig. 3A, red arrow) was relatively shallower in the mixture.  
235 Peak broadening has been attributed to shortened transverse relaxation time ( $T_2$ ) [13], which was  
236 indeed the case for the peak at 1.08 ppm (Fig. 3B). Moreover,  $T_2$  shortening is typically associated  
237 with an increase in molecular weight [13]. Overall, these results indicate an association between  
238 dTIT7 and MC16 in solution, at least at equilibrium.

239 We then generated a computer-simulated docking pose of dTIT7 with L-MC16 (Fig. 3C). To  
240 do so, we applied the strategy used to model IF7 binding with L-MC16 [6], in which two ANXA1 N-  
241 terminal domains provide a binding pocket for the ligand dTIT7. This model estimates the free  
242 energy of binding for dTIT7 to be -5.1 kcal/mol, while that for IF7 was estimated to be -3.7 kcal/mol  
243 [6].

244

### Fig. 3

245

246 **dTIT7 targeting of the brain tumor vasculature in mouse.** We then used body imaging to  
247 confirm tumor vasculature-targeting activity of dTIT7 in brain tumor model mice using a conjugate of  
248 a near infra-red fluorescent reagent IRDye 800 CW to dTIT7 peptide. IRDye-dTIT7 was injected  
249 intravenously into brain-tumor bearing nude mice, and fluorescence was visualized using Xenogen  
250 IVIS imaging in real time, at various time points from 15 minutes to 144 hours (6 days) (Fig. 4A).  
251 IRdye-dTIT7 targeted brain tumor and kidney and remained detectable in these locations for up to 6  
252 days after injection.

253 In the same model, we also tested *in vivo* tumor vasculature-targeting of additional IRDye-  
254 conjugated peptides identified in our mirror-image phage library screen, namely d-LRF7, dSPT7,  
255 dMPT7 and dLLS7, using whole body imaging. That analysis revealed signals in brain, kidney and  
256 other organs (Fig. 4B). These results suggest that D-peptide sequences deduced in our screen targeted  
257 primarily the brain tumor and kidney vasculature.

258

### Fig. 4

259

260 **Therapeutic activity of dTIT7-conjugated GA.** Previously, we conjugated IF7 with GA *via* non-  
261 cleavable linker [14]. Intravenously-injected GA-IF7 suppressed tumor growth in mouse breast,  
262 prostate, lung and melanoma tumor models [5]. Here, we prepared GA-dTIT7 as we had GA-IF7 [5]  
263 (Fig. 5) and determined its cytotoxic activity as well as that of control GA-C using C6 cells cultured  
264 *in vitro*. This assay showed the IC<sub>50</sub> of GA-dTIT7 and GA-C to be 0.396 nM and 0.410 nM,  
265 respectively (Fig. 6A).

266

### Fig. 5

267 In our previous study we found that intravenously-injected GA-IF7 at 6.5  $\mu$ moles/kg suppressed  
268 growth of melanoma, lung carcinoma, prostate cancer, and breast cancer models in the mouse [5].  
269 When we injected GA-dTIT7 at 6.5  $\mu$ moles/kg intravenously to the tumor-bearing mice in the same  
270 manner as we have done for GA-IF7, GA-dTIT7 did not suppress tumor growth (data not shown).  
271 Since it is known that the GA analogue 17-DMAG, which is a part of GA-dTIT7 (Fig. 5), is orally-  
272 administrable [15], we asked if orally-administered GA-dTIT7 enters the circulation by assessing gut-  
273 to-blood GA-dTIT7 transport using quantitative LC-MS/MS analysis of isotopically-labeled dTIT7  
274 (*isod*TIT7). The molecular weight of GA-*isod*TIT7, in which the last methionine residue contains  
275  $^{13}\text{C}$  and  $^{15}\text{N}$ , is 1725.60 Da, while that of the internal standard, GA-dTIT7, is 1719.6 Da (Fig. 6B).  
276 For this analysis, we dissolved GA-dTIT7 in 10% taurodeoxycholate (TDC) in water to enhance drug  
277 transport from the digestive tract to the circulation more efficiently than GA-dTIT7 formulated with  
278 10% Solutol HS15, 6% glucose or 10% carboxymethyl cellulose. Plasma samples from mice orally-  
279 administered GA-dTIT7 were combined with GA-*isod*TIT7. Then after removal of proteins by  
280 precipitation with cold acetone, we subjected the supernatant to LC-MS/MS analysis to determine the  
281 quantity of GA-dTIT7. This analysis showed a time-dependent increase in GA-dTIT7 in mouse  
282 plasma, peaking at 30 min (Fig. 6C). When 1 mg GA-dTIT7 was orally-administered, the plasma  
283 concentration drug at 30 min was  $2.62 \pm 0.69$  ng /mL, or 1.52 nM.

284 Next, we tested the therapeutic effect of orally-administered GA-dTIT7 on brain tumors *in vivo*.  
285 We had previously shown that IF7-SN38 overcame the BBB and suppressed brain tumor growth in  
286 model mice [6]. To determine whether GA-dTIT7 functioned similarly, we established B16-Luc  
287 tumors in brains of C57BL/6 mice and monitored tumor growth by photon number produced by  
288 luciferase using IVIS imaging. When photon number reached  $1 \times 10^4$ , we orally administered GA-  
289 dTIT7 (1 mg or 0.58  $\mu$ moles) in 200  $\mu$ L in 10% TDC in water daily for 7 days but did not observe  
290 suppression of tumor growth (data not shown). However, when we doubled the GA-dTIT7 dose to 2  
291 mg and orally-administered the drug daily for 5 days, imaging revealed significant suppression of

292 tumor growth in GA-dTIT7-treated mice, while tumors continued to grow in control mice that had  
293 received 1 mg GA-C (the molar equivalent of GA-dTIT7) daily for 5 days (Fig. 6D). Comparable  
294 analysis using C6-Luc brain tumor models in nude mice revealed tumor growth suppression by GA-  
295 dTIT7 but not control GA-C (Fig. 6E). These results showed, as a proof-of-concept, that orally-  
296 administered GA-dTIT7 suppresses brain tumors *in vivo* in mice.

297 **Fig. 6**

298

299

## 300 **Discussion**

301 Here we used a mirror-image peptide display strategy [8] to identify a series of linear 7-mer  
302 D-peptides using the ANXA1 NH<sub>2</sub>-terminal domain peptide (Fig. 1A). Because this strategy requires  
303 a chemically synthesized receptor made of D-amino acids, the application is limited to proteins in  
304 which a synthetic version of the peptide functions as receptor for the protein of interest. Nonetheless,  
305 this strategy have been successfully applied to develop therapeutic D-peptide modulators of the tyrosine  
306 kinase SH3 domain [7] or inhibitors of amyloid beta aggregation in Alzheimer's disease [16]. In both  
307 cases, each D-target conformed to a unique stereo-specific structure and provided a binding pocket for  
308 L-peptides displayed on the phage. In our study, we also exploited the fact that a chemically-  
309 synthesized peptide representing the ANXA1 NH<sub>2</sub>-terminal domain (MC16) served as receptor for IF7  
310 [6]. Although MC16 is considered too short and flexible in solution to form a stable 3-D structure,  
311 IF7/MC16 interactions were detected in our binding assays, including a plate binding assay,  
312 fluorescence correlation spectroscopy, and QCM [6]. Indeed, D-peptides identified by a D-MC16 target  
313 also bound to L-MC16 and full-length ANXA1 protein (Figs. 2 and 3).

314

315 Others have reported a D-peptide alternative for IF7 designated retro-inverso IF7 (RIF7), in  
316 which the reverse IF7 sequence was synthesized using D-amino acids [17]. When RIF7 was  
317 conjugated to red fluorescent 5-carboxytetramethylrhodamine (TMR) and then injected intravenously  
318 into a pulmonary cancer model mouse, TMR-RIF7 targeted the lung tumor and exhibited prolonged  
319 stability compared to TMR-IF7 [17]. That study showed that TMR-IF7 and TMR-RIF7 targeted not  
320 only tumors but also several normal organs. Such non-specific organ targeting is likely due partially  
321 to TMR, as green fluorescent Alexa 488-labeled IF7 targeted brain tumors but not to the normal  
322 organs [6]. Thus far no one has reported a therapeutic effect of a RIF7-conjugated drug.

323

324 Currently, tumors are often diagnosed by positron emission tomography (PET) scans utilizing  
325 radioactive  $^{18}\text{F}$  glucose or FDG. Despite the highly specific tumor vasculature targeting activity of  
326 IF7, our attempts to conduct PET with IF7 were not successful (data not shown), although others have  
327 shown detectable, though limited, tumor imaging with IF7 [18-20]. We emphasize, however, that  
328 whole body imaging of IRDye-conjugated dTIT7 indicated clear brain tumor targeting (Fig. 4).  
329 Compared with other organ systems, FDG-PET imaging of the brain presents unique challenges  
330 because of high background glucose metabolism in normal gray matter [21]. We consider that D-  
331 peptides identified here warrant further testing in imaging of brain tumors.

332

333 Although we had anticipated that intravenously-injected GA-dTIT7 would exhibit anti-tumor  
334 activity *in vivo*, we did not observe therapeutic activity of dTIT7-conjugated drugs following  
335 intravenous injection, suggesting that either higher dosages of GA-dTIT7 or different drug  
336 formulation may be required. Relevant to the latter, detergents significantly alter IF7-SN38  
337 therapeutic efficacy: we have shown that formulation with 10% Solutol in water significantly reduces  
338 the effective dosage against brain tumors [6]. Future studies should address these issues in the case of  
339 GA-dTIT7 following intravenous injection.

340

341 GA analogues 17-AAG and 17-DMAG have been shown to be potent anti-cancer agents with  
342 less toxicity than the parental drug GA. However, several clinical trials with these GA analogues  
343 indicated toxicity too high to proceed beyond a phase II trial [22, 23]. Nonetheless, pre-clinical and  
344 clinical studies of the GA analogue 17-DMAG showed it is orally-administrable [15, 24]. We found  
345 that GA-dTIT7 (Fig. 5) is orally administrable and suppressed tumor growth in mouse brain tumor  
346 models (Fig. 6 DE). We were able to test oral administration of GA-dTIT7 as this compound exhibits  
347 cytotoxic activity (Fig 6A). GA-dTIT7 should be stable *in vivo*, as GA is linked to dTIT7 through an  
348 esterase-resistant linker and dTIT7 is expected to be resistant to digestive proteases. Although the  
349 efficacy of GA-dTIT7 gut-to-blood transport was low here (Fig. 6C), future studies should address  
350 how to improve this efficacy. Additional modification of GA-dTIT7 to enhance ANXA1-binding and  
351 gut-to-blood transfer activities could strengthen the clinical relevance of this drug.

352

353 Cancer treatments are increasingly expensive due to development of sophisticated diagnostics  
354 and therapies. Our drug, which consists of a short peptide plus an anti-cancer reagent, can be  
355 chemically synthesized cost-effectively. Given that ANXA1 is an extremely specific tumor  
356 vasculature surface marker [2], and IF7-conjugated anti-cancer drugs have profound effects on  
357 subcutaneous and brain tumors [5, 6, 25], a drug conjugated to an ANXA1-binding peptide should  
358 eradicate tumors effectively at low dosage and minimize side effects. Finally, orally-administrable  
359 drugs would be advantageous in economically disadvantaged societies that lack infrastructure  
360 required for costly treatment. As clinical trials with tumor vasculature-homing peptides are beginning,  
361 we will soon be able to evaluate efficacy of these strategies in cancer patients. Further development  
362 of peptide-conjugated drugs could reveal strong candidates for clinical applications to treat intractable  
363 cancers.

364

365

## 366 **Acknowledgement**

367           This study was supported by an institutional grant LEAD at National Institute of Advanced  
368 Industrial Science and Technology, by the Project for Cancer Research and Therapeutic Evolution (P-  
369 CREATE) from Japan Agency for Medical Research and Development (AMED) to MNF, by P41  
370 GM103390 and P41 RR005351. NM is a recipient of a Research Grant for Young Japanese Scientists  
371 from The Nakajima Foundation. We thank Dr. Elise Lamar for editing the manuscript and Mrs. Hisae  
372 Okuhara for clerical/administrative assistance.

373

374



## 375 **Figure Legends**

376 **Fig. 1. Mirror-image phage library screen for MC16-binding D-peptides.** **A.** Strategy used to  
377 identify D-peptides using D-MC16 peptide as the target. **B.** Binding efficacy of phage pools obtained  
378 after each round, as assessed by plaque-forming assays. **C.** Proportion of peptides of various  
379 sequences in the third positive pool. The phage mixture was analyzed by next generation sequencing  
380 and ranked for peptide abundance (Supplemental Table 1). **D.** Distribution of peptide sequences in the  
381 third positive pool. **E.** Binding of phage clones displaying the TIT7 peptide sequence to D-MC16-  
382 versus control (blank)-coated plastic plates.

383

384 **Fig. 2. Binding of dTIT7 to an ANXA1 N-terminal domain peptide or to full-length ANXA1**  
385 **protein.** **A.** Plate binding assay of N-terminal biotinylated dTIT7 to synthetic human MC16 peptide,  
386 which represents the ANXA1 N-terminus. **B.** dTIT7 binding to human MC16 peptide and its mutants.  
387 In A and B, biotinylated dTIT7 peptide (1  $\mu\text{g/mL}$ ) was added to each MC16-coated plastic well and  
388 binding of peptide to MC16 was detected by a peroxidase-conjugated streptavidin and peroxidase  
389 color reaction. **C.** dTIT7 binding to recombinant full-length ANXA protein based on QCM analysis,  
390 which determines mass per unit area by measuring change in frequency of a dTIT7-coated sensor. **D.**  
391 Comparable QCM analysis relevant to other peptides identified in the screen.

392

393 **Fig. 3. NMR analysis of dTIT7 interaction with monomeric L-MC16 in solution, and computer-**  
394 **simulated structure model of dTIT7 bound to the ANXA1 N-terminal domain.** **A.** Shown are  
395 NMR spectra (methyl region) of dTIT7 (black line) or MC16 (blue line), the sum of both spectra  
396 (green line), and that of a mixture of both peptides (red line). Black arrow in square expanded at right  
397 indicates a peak at 0.73 ppm that emerged in the mixture spectrum, while red arrow indicates a peak  
398 at 1.08 ppm attributable to dTIT7. **B.** Transverse relaxation time ( $T_2$ ) of the dTIT7 peak at 1.08 ppm  
399 (red arrow in c) in the free state or in a mixture with MC16. **C.** Computer-simulated structural model

400 for dTIT7 binding to the ANXA1 N-terminal domain. Proposed model was deduced by our previous  
401 study suggested that IF7 binds to an Anxa1 dimer [5], and results shown here suggest that MC16  
402 polymerization is required for dTIT7 binding. The ANXA1 dimer structure was constructed by the  
403 Zdock module for protein-protein docking [9] and the 1HM6 X-ray structure of full-length ANXA1  
404 was added to the 1MCX core domain at residue 40 [26, 27]. The modeled structure was then  
405 hydrogenated using the Protonate 3D module in MOE. After partial charges were assigned using the  
406 AMBER99 force field [28], hydrogen atoms were minimized. The dimer structure proposed here was  
407 ranked 37th in the top 2000 structures by this program. The Alpha Site Finder module in MOE was  
408 used to identify a potential IF7 binding pocket within the dimer. The proposed model was further  
409 validated by dG scoring calculated using MOE software with GBVI/WSA, a program allowing  
410 comparison of calculated and observed energetics [29]. The dTIT7 docking pose was calculated to be  
411 -5.1 kcal/mol.

412

413 **Fig. 4. Whole body image analysis of IRDye-dTIT7 in brain tumor-bearing mice.** A. Nude mice  
414 harboring C6-Luc brain tumors were injected with IRDye-dTIT7 through the tail vein. Whole body  
415 imaging of infra-red fluorescence was monitored using an IVIS imager. Right graph shows  
416 quantitative analysis of infra-red fluorescence signals in mice shown in left. B. Comparable whole  
417 body imaging for IRDye-conjugated dLRF7, dSPT7, dMPT7 and dLLS7.

418

419 **Fig. 5. Three steps for the synthesis of GA-dTIT7.** Procedures described by Mandler *et al.*[12]  
420 were modified as described in Materials and Methods. Note that 17-APA-GA is also known as 17-  
421 DMAG [15].

422

423 **Fig. 6. Therapeutic effect of orally administered GA-dTIT7 on brain tumors.** A. Mouse  
424 melanoma B16 cells were treated with reagents shown at indicated concentrations, cultured 2 days,  
425 and assessed for viability using a CellTiter Glo (Promega) assay. The IC<sub>50</sub> of each reagent was

426 determined using GraphPad Prism program. B. Quantitative analysis of GA-dTIT7 in mouse plasma  
427 by LC-MS/MS. Plasma from GA-dTIT7-injected C57BL/6 female mice (9  $\mu$ L) were combined with 1  
428  $\mu$ L GA-*isod*TIT7 (1.0  $\mu$ g), immediately mixed with 40  $\mu$ L cold acetone, and then centrifuged to  
429 remove precipitates. The supernatant was then applied to LC-MS/MS, and eluates monitored by m/z  
430 1725 for GA-*isod*TIT7 (blue) and m/z 1719 for GA-dTIT7 (red). C. GA-dTIT7 levels in plasma  
431 from mice-orally administered GA-dTIT7. Each C57BL/6 mouse was orally-administered 1 mg GA-  
432 dTIT7. GA-dTIT7 levels were determined by LC-MS/MS, as shown in Supplemental Fig. 4. C. B16-  
433 Luc cells were injected into the brain of C57BL/6 mouse and tumor growth was monitored by IVIS  
434 imaging. When photon number reached  $2 \times 10^4$  (approximately 5 days after B16-Luc cells  
435 inoculation), GA-dTIT7 (1.16  $\mu$ moles or 2 mg) or the molar equivalent GA-C (control) diluted with  
436 10% taurodeoxycholate (200  $\mu$ l) was orally-administered daily for 5 days. Panels at left show  
437 representative control and experimental mice imaged on days 0 and 5 after drug administration.  
438 Photon number is quantified at right. D. C6-Luc cells were injected into the brain of C57BL/6 mice  
439 and tumor growth was monitored by IVIS imaging. When photon number reached at  $2 \times 10^4$   
440 (approximately 10 days after C6-Luc cells inoculation), GA-dTIT7 and control GA-C were orally  
441 administered daily for 10 days. Panels at left show representative control and experimental mice  
442 imaged on days 0 and 10 after drug administration. Photon number is quantified at right. In these  
443 graphs, error bars denote means  $\pm$  SEM. Statistical analysis was assessed by Student's t-test.  
444  
445

## 446 **References**

- 447 1. Ruoslahti E, Rajotte D. An address system in the vasculature of normal tissues and  
448 tumors. *Annu Rev Immunol.* 2000;18:813-27. PubMed PMID: 10837076.
- 449 2. Oh P, Li Y, Yu J, Durr E, Krasinska KM, Carver LA, et al. Subtractive proteomic  
450 mapping of the endothelial surface in lung and solid tumours for tissue-specific therapy.  
451 *Nature.* 2004;429(6992):629-35. PubMed PMID: 15190345.
- 452 3. Oh P, Testa JE, Borgstrom P, Witkiewicz H, Li Y, Schnitzer JE. In vivo proteomic  
453 imaging analysis of caveolae reveals pumping system to penetrate solid tumors. *Nat Med.*  
454 2014;20(9):1062-8. doi: 10.1038/nm.3623. PubMed PMID: 25129480.
- 455 4. Hatakeyama S, Sugihara K, Nakayama J, Akama TO, Wong SM, Kawashima H, et al.  
456 Identification of mRNA splicing factors as the endothelial receptor for carbohydrate-  
457 dependent lung colonization of cancer cells. *Proc Natl Acad Sci U S A.* 2009;106(9):3095-  
458 100. PubMed PMID: 19218444; PubMed Central PMCID: PMC264266.
- 459 5. Hatakeyama S, Sugihara K, Shibata TK, Nakayama J, Akama TO, Tamura N, et al.  
460 Targeted drug delivery to tumor vasculature by a carbohydrate mimetic peptide. *Proc Natl*  
461 *Acad Sci U S A.* 2011;108(49):19587-92. Epub 2011/11/25. doi: 1105057108 [pii]  
462 10.1073/pnas.1105057108. PubMed PMID: 22114188; PubMed Central PMCID:  
463 PMC3241764.
- 464 6. Nonaka M, Suzuki-Anekoji M, Nakayama J, Mabashi-Asazuma H, Jarvis DL, Yeh  
465 JC, et al. Overcoming the blood-brain barrier by Annexin A1-binding peptide to target brain  
466 tumours. *Br J Cancer.* 2020. Epub 2020/09/15. doi: 10.1038/s41416-020-01066-2. PubMed  
467 PMID: 32921792.

- 468 7. Schumacher TN, Mayr LM, Minor DL, Jr., Milhollen MA, Burgess MW, Kim PS.  
469 Identification of D-peptide ligands through mirror-image phage display. *Science*.  
470 1996;271(5257):1854-7. Epub 1996/03/29. PubMed PMID: 8596952.
- 471 8. Funke SA, Willbold D. Mirror image phage display--a method to generate D-peptide  
472 ligands for use in diagnostic or therapeutical applications. *Mol Biosyst*. 2009;5(8):783-6. doi:  
473 10.1039/b904138a. PubMed PMID: 19603110.
- 474 9. Chen R, Li L, Weng Z. ZDOCK: an initial-stage protein-docking algorithm. *Proteins*.  
475 2003;52(1):80-7. Epub 2003/06/05. doi: 10.1002/prot.10389. PubMed PMID: 12784371.
- 476 10. Jarvis DL. Baculovirus-insect cell expression systems. *Methods Enzymol*.  
477 2009;463:191-222. Epub 2009/11/07. doi: 10.1016/S0076-6879(09)63014-7. PubMed PMID:  
478 19892174.
- 479 11. Suzuki M, Nakayama J, Suzuki A, Angata K, Chen S, Sakai K, et al. Polysialic acid  
480 facilitates tumor invasion by glioma cells. *Glycobiology*. 2005;15(9):887-94. PubMed PMID:  
481 15872150.
- 482 12. Mandler R, Dadachova E, Brechbiel JK, Waldmann TA, Brechbiel MW. Synthesis  
483 and evaluation of antiproliferative activity of a geldanamycin-Herceptin immunoconjugate.  
484 *Bioorg Med Chem Lett*. 2000;10(10):1025-8. PubMed PMID: 10843208.
- 485 13. Wüthrich K. *NMR of Proteins and Nucleic Acids*. New York: John Wiley & Sons;  
486 1986.
- 487 14. DeBoer C, Meulman PA, Wnuk RJ, Peterson DH. Geldanamycin, a new antibiotic. *J*  
488 *Antibiot (Tokyo)*. 1970;23(9):442-7. Epub 1970/09/01. doi: 10.7164/antibiotics.23.442.  
489 PubMed PMID: 5459626.

- 490 15. Ikebe E, Kawaguchi A, Tezuka K, Taguchi S, Hirose S, Matsumoto T, et al. Oral  
491 administration of an HSP90 inhibitor, 17-DMAG, intervenes tumor-cell infiltration into  
492 multiple organs and improves survival period for ATL model mice. *Blood Cancer J*.  
493 2013;3:e132. Epub 2013/08/21. doi: 10.1038/bcj.2013.30. PubMed PMID: 23955587;  
494 PubMed Central PMCID: PMC3763384.
- 495 16. Wiesehan K, Buder K, Linke RP, Patt S, Stoldt M, Unger E, et al. Selection of D-  
496 amino-acid peptides that bind to Alzheimer's disease amyloid peptide abeta1-42 by mirror  
497 image phage display. *Chembiochem*. 2003;4(8):748-53. Epub 2003/08/05. doi:  
498 10.1002/cbic.200300631. PubMed PMID: 12898626.
- 499 17. Chen X, Fan Z, Chen Y, Fang X, Sha X. Retro-inverso carbohydrate mimetic  
500 peptides with annexin1-binding selectivity, are stable in vivo, and target tumor vasculature.  
501 *PLoS One*. 2013;8(12):e80390. doi: 10.1371/journal.pone.0080390. PubMed PMID:  
502 24312470; PubMed Central PMCID: PMC3846562.
- 503 18. Chen F, Pu X, Xiao Y, Shao K, Wang J, Hu W, et al. Preparation and SPECT  
504 imaging of the novel Anxa 1-targeted probe  
505 <sup>99m</sup>Tc-p-SCN-Bn-DTPA-GGGRDN-IF7. *Journal of Radioanalytical and Nuclear*  
506 *Chemistry*. 2019;320:525–30. doi: doi.org/10.1007/s10967-019-06500-1.
- 507 19. Chen F, Xiao Y, Shao K, Zhu B, Jiannng M. Positron emission tomography imaging of  
508 a novel Anxa1-targeted peptide <sup>18</sup>F-AI-NODA-Bn-p-SCN-GGGRDNIF7 in A431 cancer  
509 mouse models. *J Label Compd Radiopharm*. 2020:1-8. doi: 10.1002/jlcr.3865.
- 510 20. Gu X, Jiang M, Pan D, Cai G, Zhang R, Zhou Y, et al. Preliminary evaluation of  
511 novel <sup>18</sup>F-AIF-NOTA-IF7 as a tumor  
512 imaging agent. *Radioanal Nucl Chem*. 2016;308:851-6. doi: 10.1007/s10967-015-4533-3.

- 513 21. Wong TZ, van der Westhuizen GJ, Coleman RE. Positron emission tomography  
514 imaging of brain tumors. *Neuroimaging Clin N Am*. 2002;12(4):615-26. Epub 2003/04/12.  
515 PubMed PMID: 12687915.
- 516 22. Ronnen EA, Kondagunta GV, Ishill N, Sweeney SM, Deluca JK, Schwartz L, et al. A  
517 phase II trial of 17-(Allylamino)-17-demethoxygeldanamycin in patients with papillary and  
518 clear cell renal cell carcinoma. *Invest New Drugs*. 2006;24(6):543-6. PubMed PMID:  
519 16832603.
- 520 23. Kang MH, Reynolds CP, Houghton PJ, Alexander D, Morton CL, Kolb EA, et al.  
521 Initial testing (Stage 1) of AT13387, an HSP90 inhibitor, by the pediatric preclinical testing  
522 program. *Pediatr Blood Cancer*. 2012;59(1):185-8. doi: 10.1002/pbc.23154. PubMed PMID:  
523 21538821; PubMed Central PMCID: PMC3154460.
- 524 24. Li YP, Gao LY, Li KT, Meng S, Zhu JH, Li D, et al. LC-MS/MS method for  
525 determination of geldanamycin derivative GM-AMPL in rat plasma to support preclinical  
526 development. *J Chromatogr B Analyt Technol Biomed Life Sci*. 2013;912:43-9. Epub  
527 2012/12/25. doi: 10.1016/j.jchromb.2012.09.002. PubMed PMID: 23261821.
- 528 25. Yu DH, Liu YR, Luan X, Liu HJ, Gao YG, Wu H, et al. IF7-Conjugated  
529 Nanoparticles Target Annexin 1 of Tumor Vasculature against P-gp Mediated Multidrug  
530 Resistance. *Bioconj Chem*. 2015;26(8):1702-12. Epub 2015/06/16. doi:  
531 10.1021/acs.bioconjchem.5b00283. PubMed PMID: 26076081.
- 532 26. Shesham RD, Bartolotti LJ, Li Y. Molecular dynamics simulation studies on Ca<sup>2+</sup> -  
533 induced conformational changes of annexin I. *Protein Eng Des Sel*. 2008;21(2):115-20. Epub  
534 2008/02/20. doi: 10.1016/j.pebs.2007.12.015 [pii]  
535 10.1093/protein/gzm094. PubMed PMID: 18283055.

- 536 27. Rosengarth A, Gerke V, Luecke H. X-ray structure of full-length annexin 1 and  
537 implications for membrane aggregation. *J Mol Biol.* 2001;306(3):489-98. Epub 2001/02/17.  
538 doi: 10.1006/jmbi.2000.4423  
539 S0022-2836(00)94423-1 [pii]. PubMed PMID: 11178908.
- 540 28. Kollman PA, Massova I, Reyes C, Kuhn B, Huo S, Chong L, et al. Calculating  
541 structures and free energies of complex molecules: combining molecular mechanics and  
542 continuum models. *Acc Chem Res.* 2000;33(12):889-97. Epub 2000/12/22. doi: ar000033j  
543 [pii]. PubMed PMID: 11123888.
- 544 29. Corbeil CR, Williams CI, Labute P. Variability in docking success rates due to  
545 dataset preparation. *J Comput Aided Mol Des.* 2012;26(6):775-86. Epub 2012/05/09. doi:  
546 10.1007/s10822-012-9570-1. PubMed PMID: 22566074; PubMed Central PMCID:  
547 PMC3397132.
- 548
- 549
- 550
- 551
- 552



553 **Supporting Information**

554

555 **S1 Table. Nucleotide and peptide sequences obtained by NGS (next generation sequencing) of**  
556 **the third positive phage pool.**

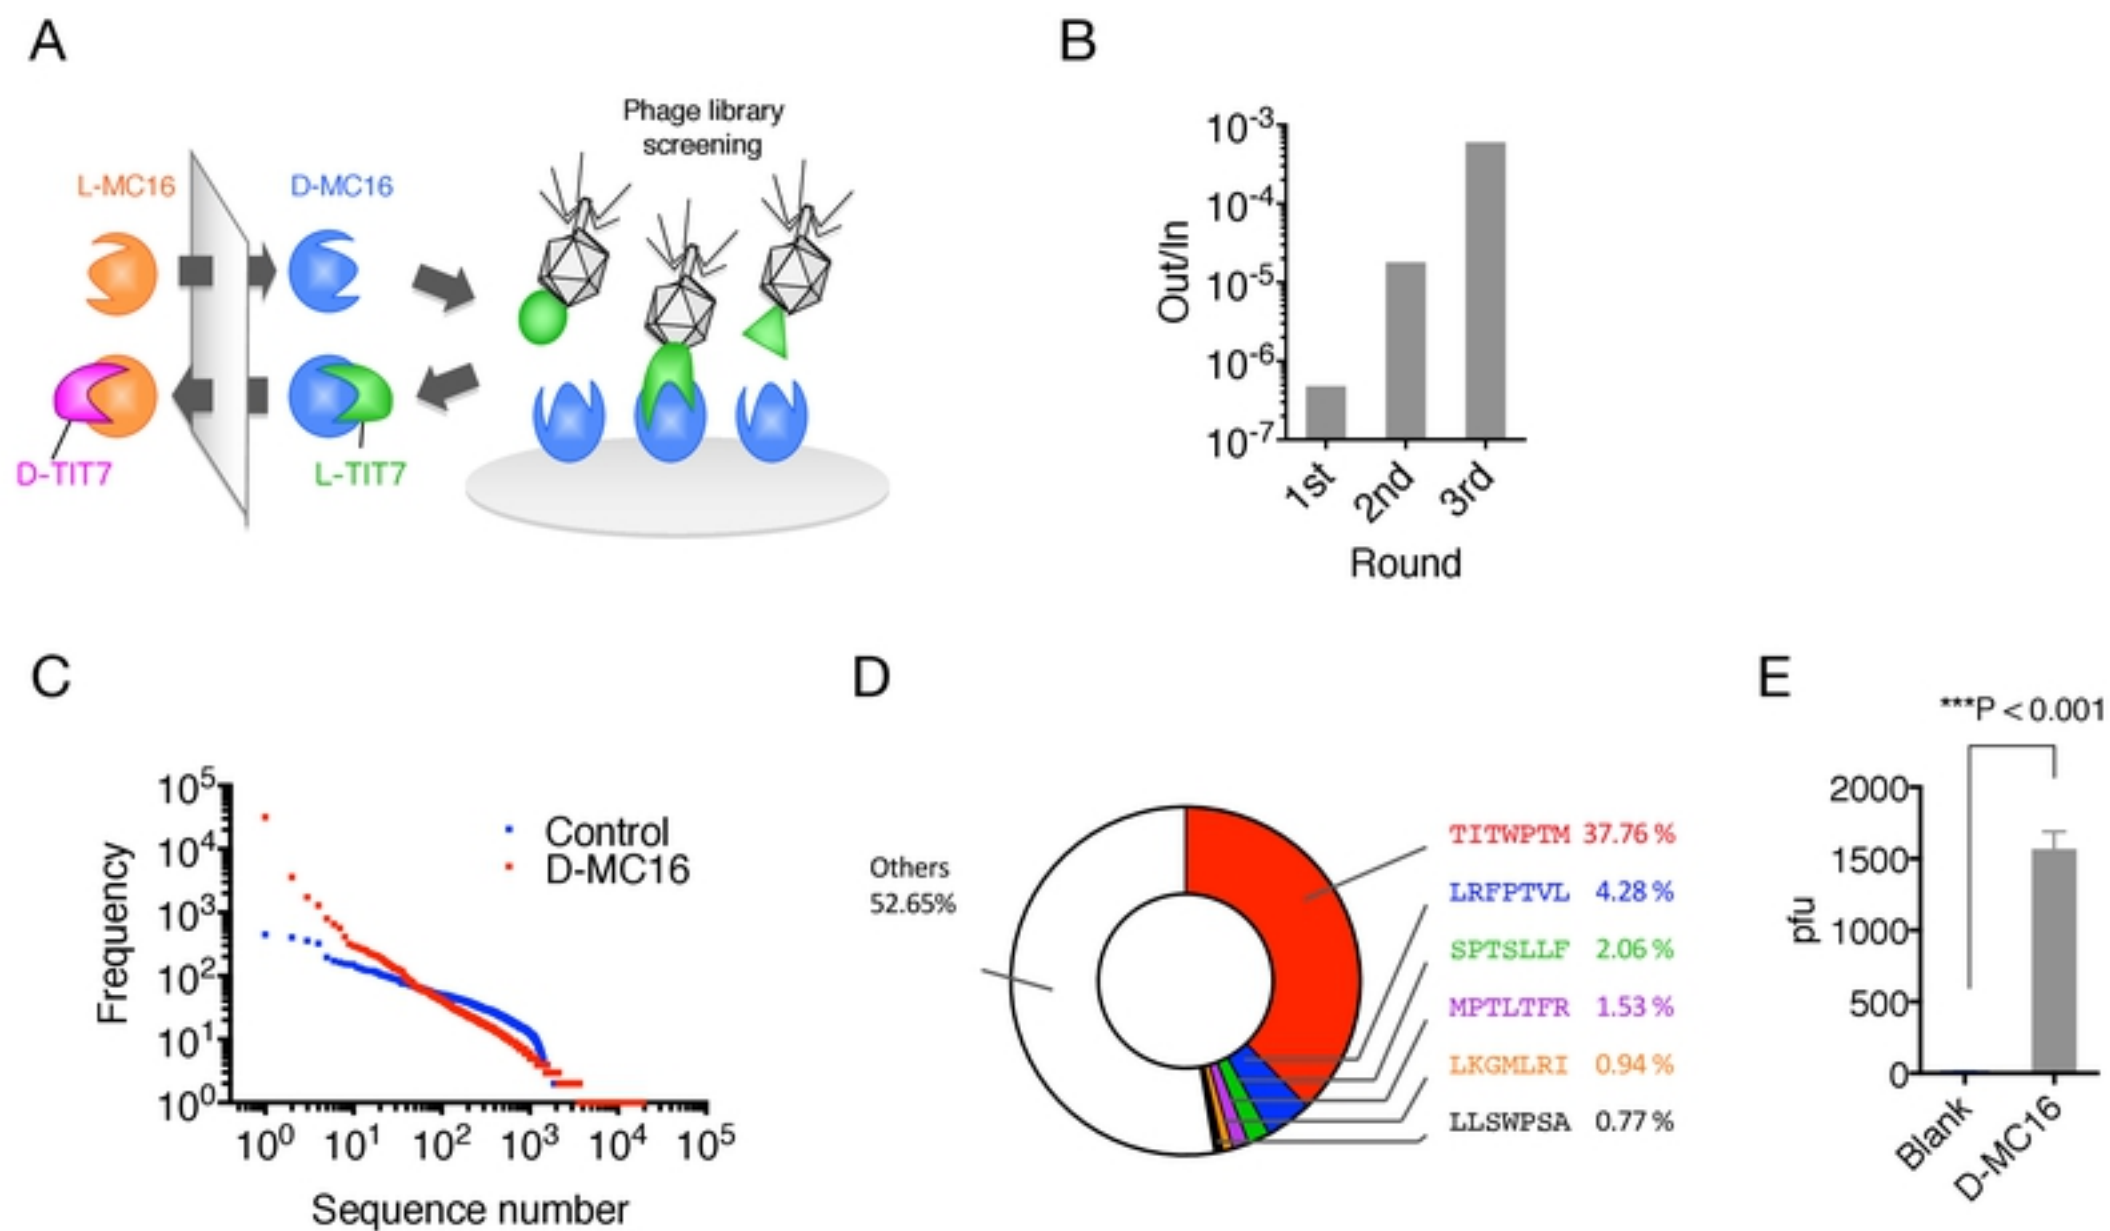

Fig. 1

A

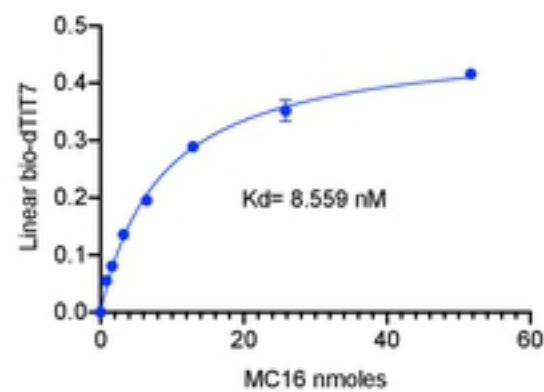

B

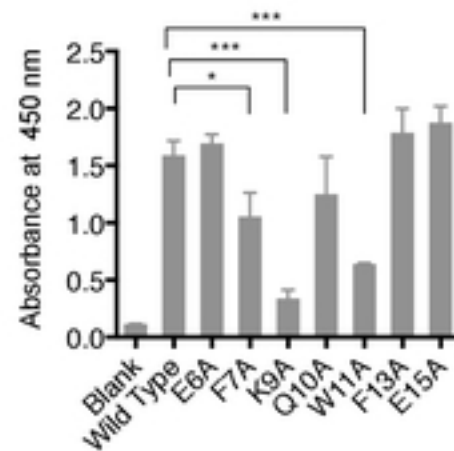

C

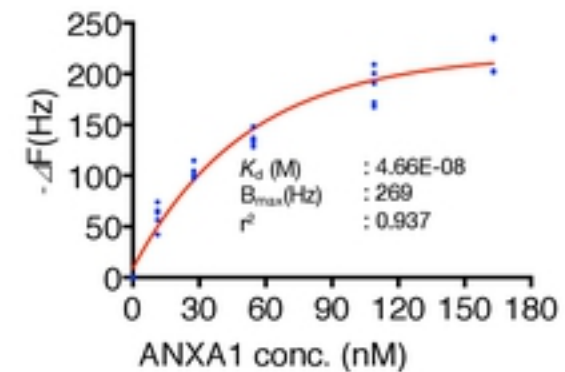

D

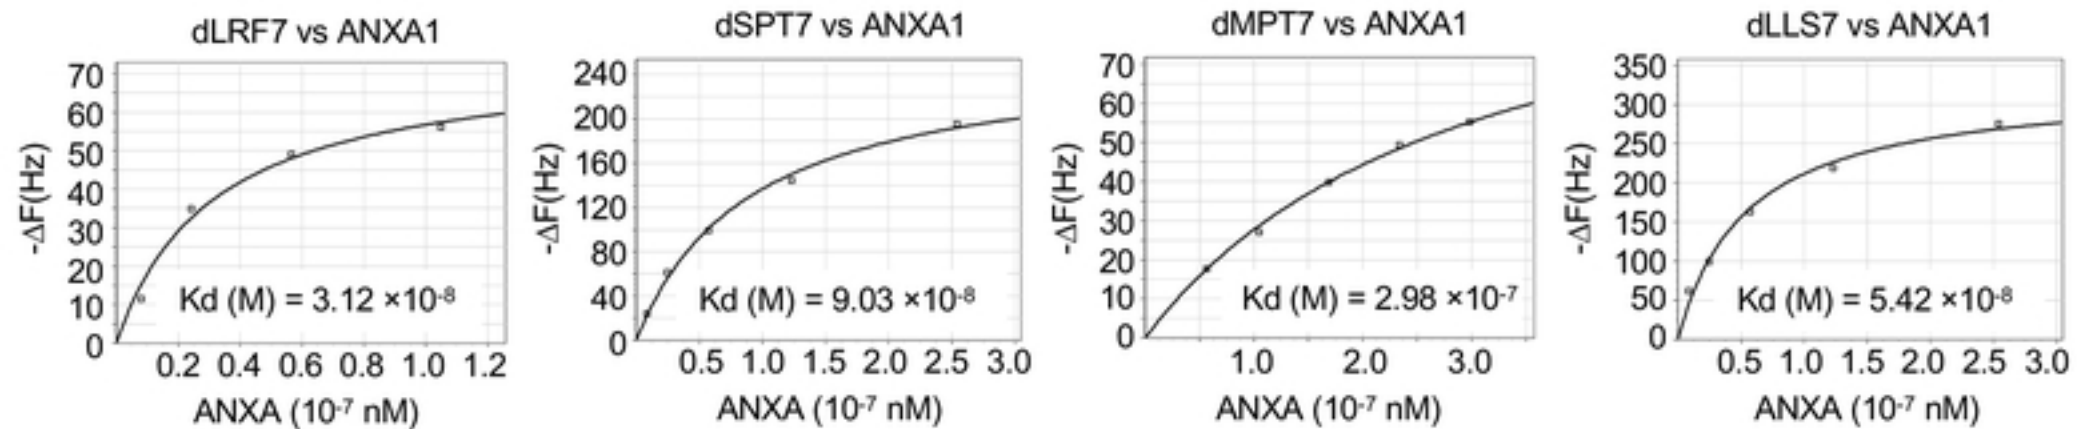

Fig. 2

A

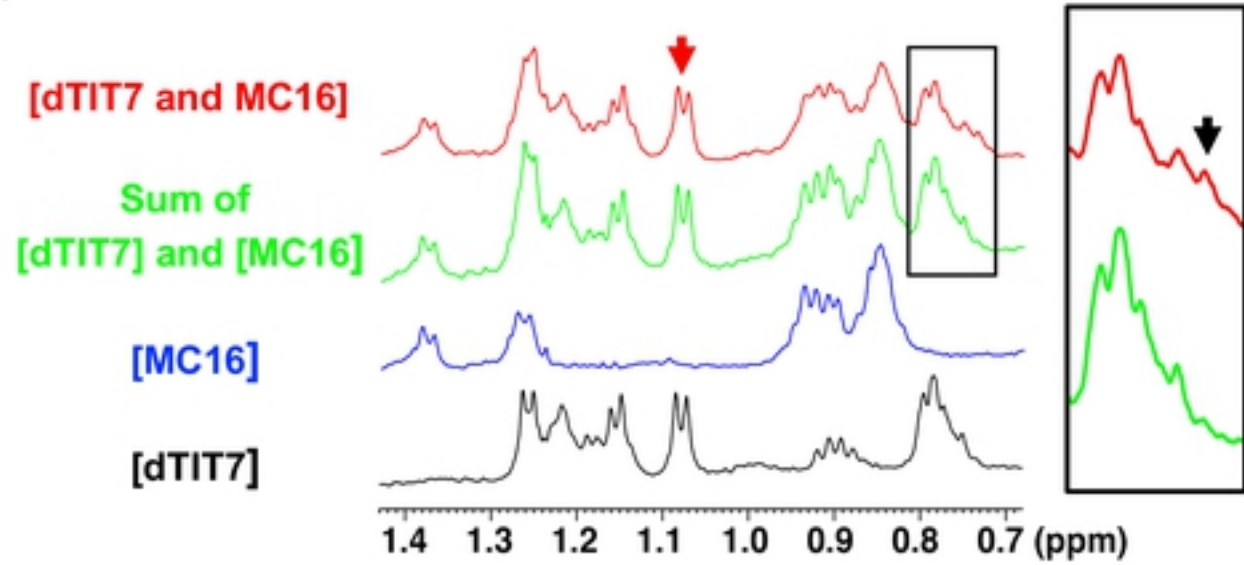

B

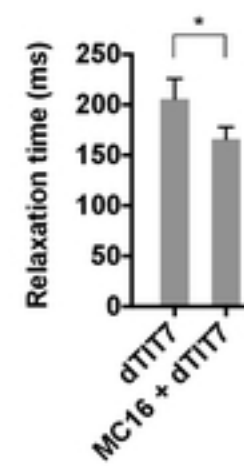

C

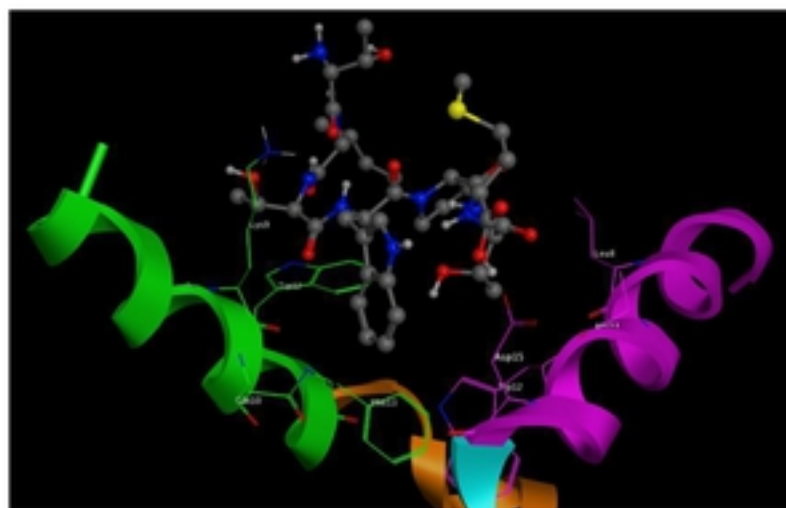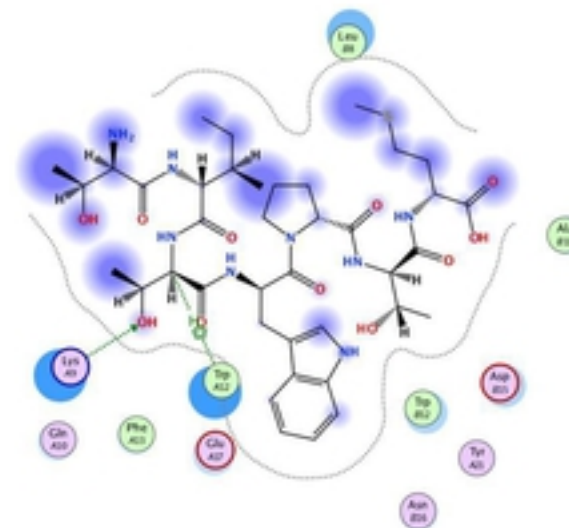

Fig. 3

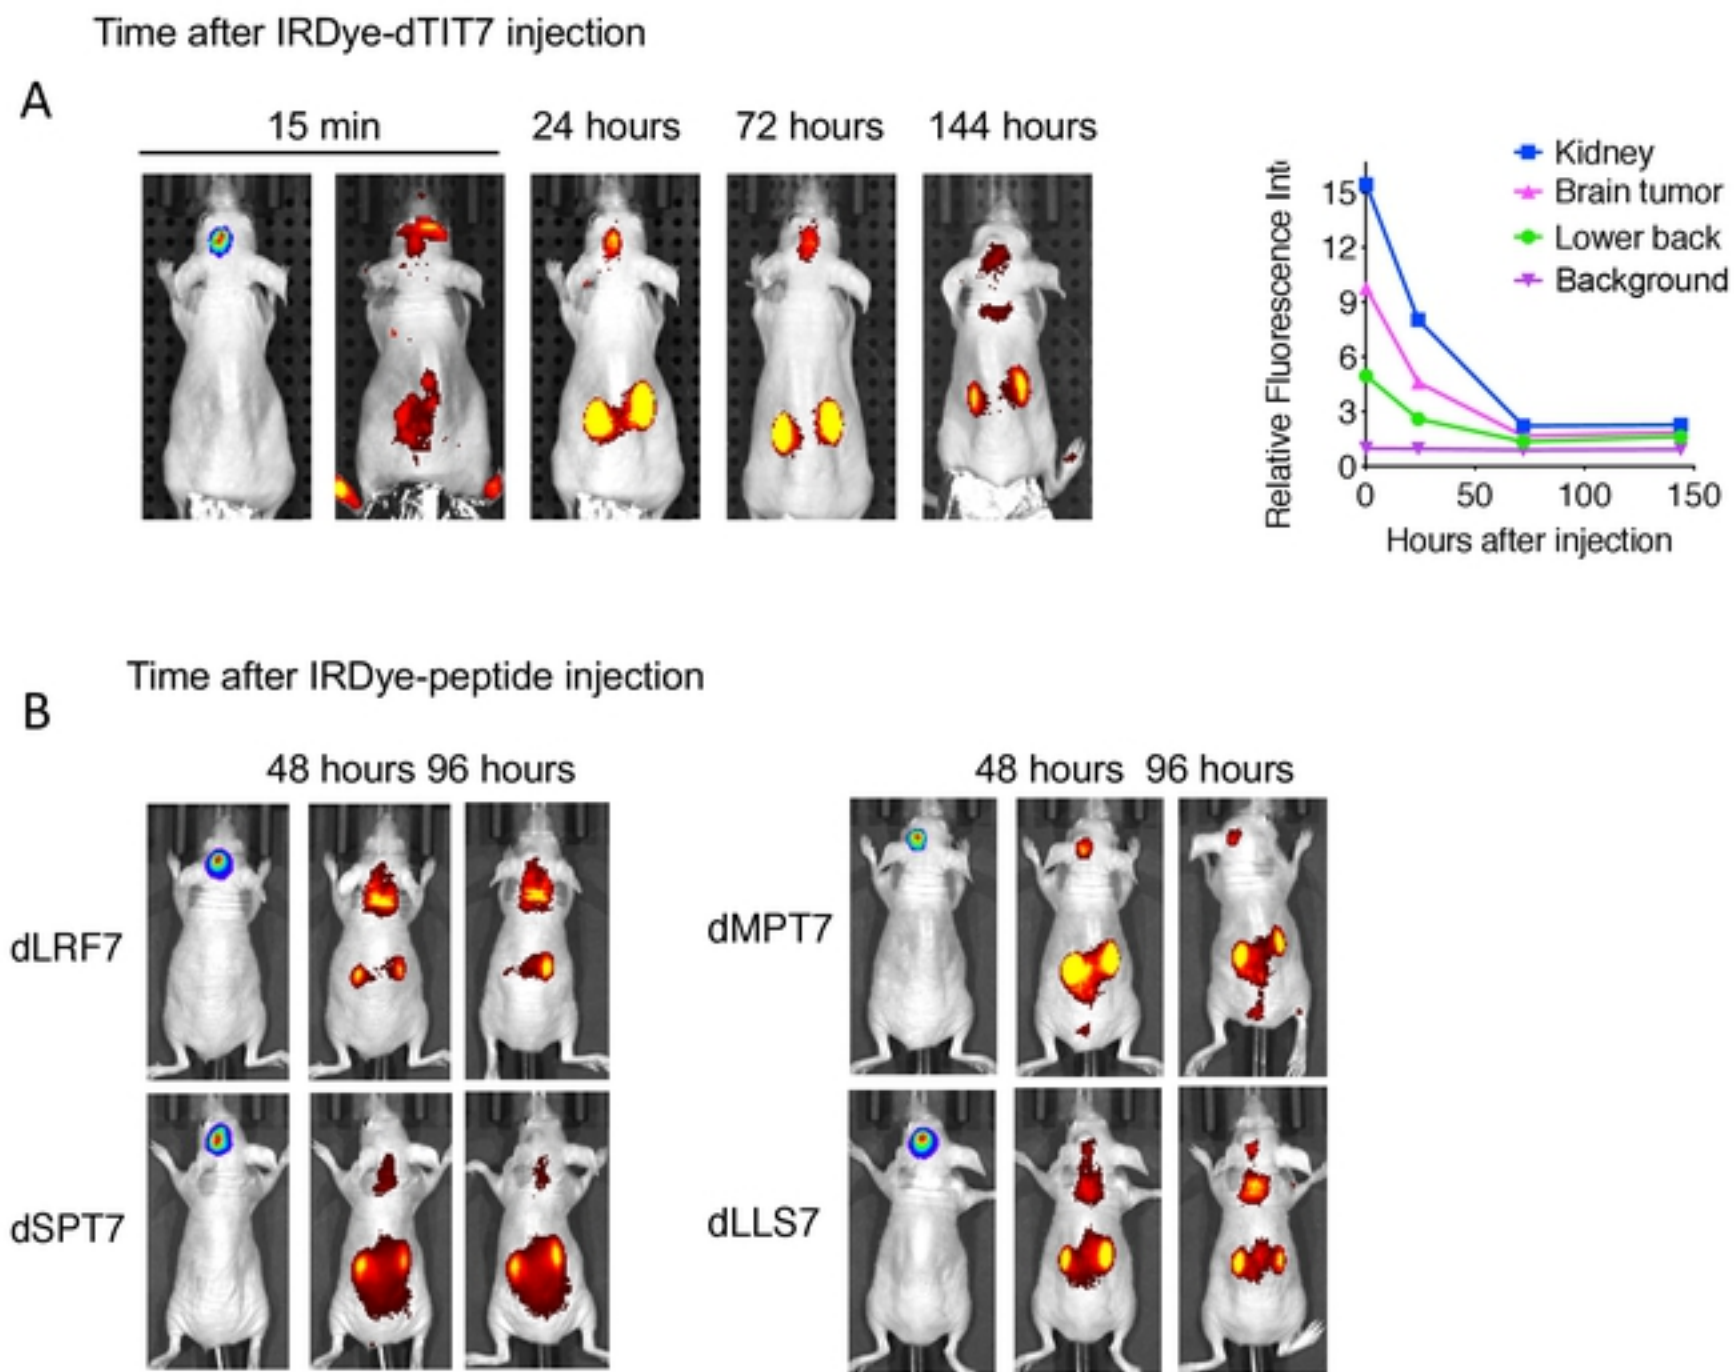

Fig. 4

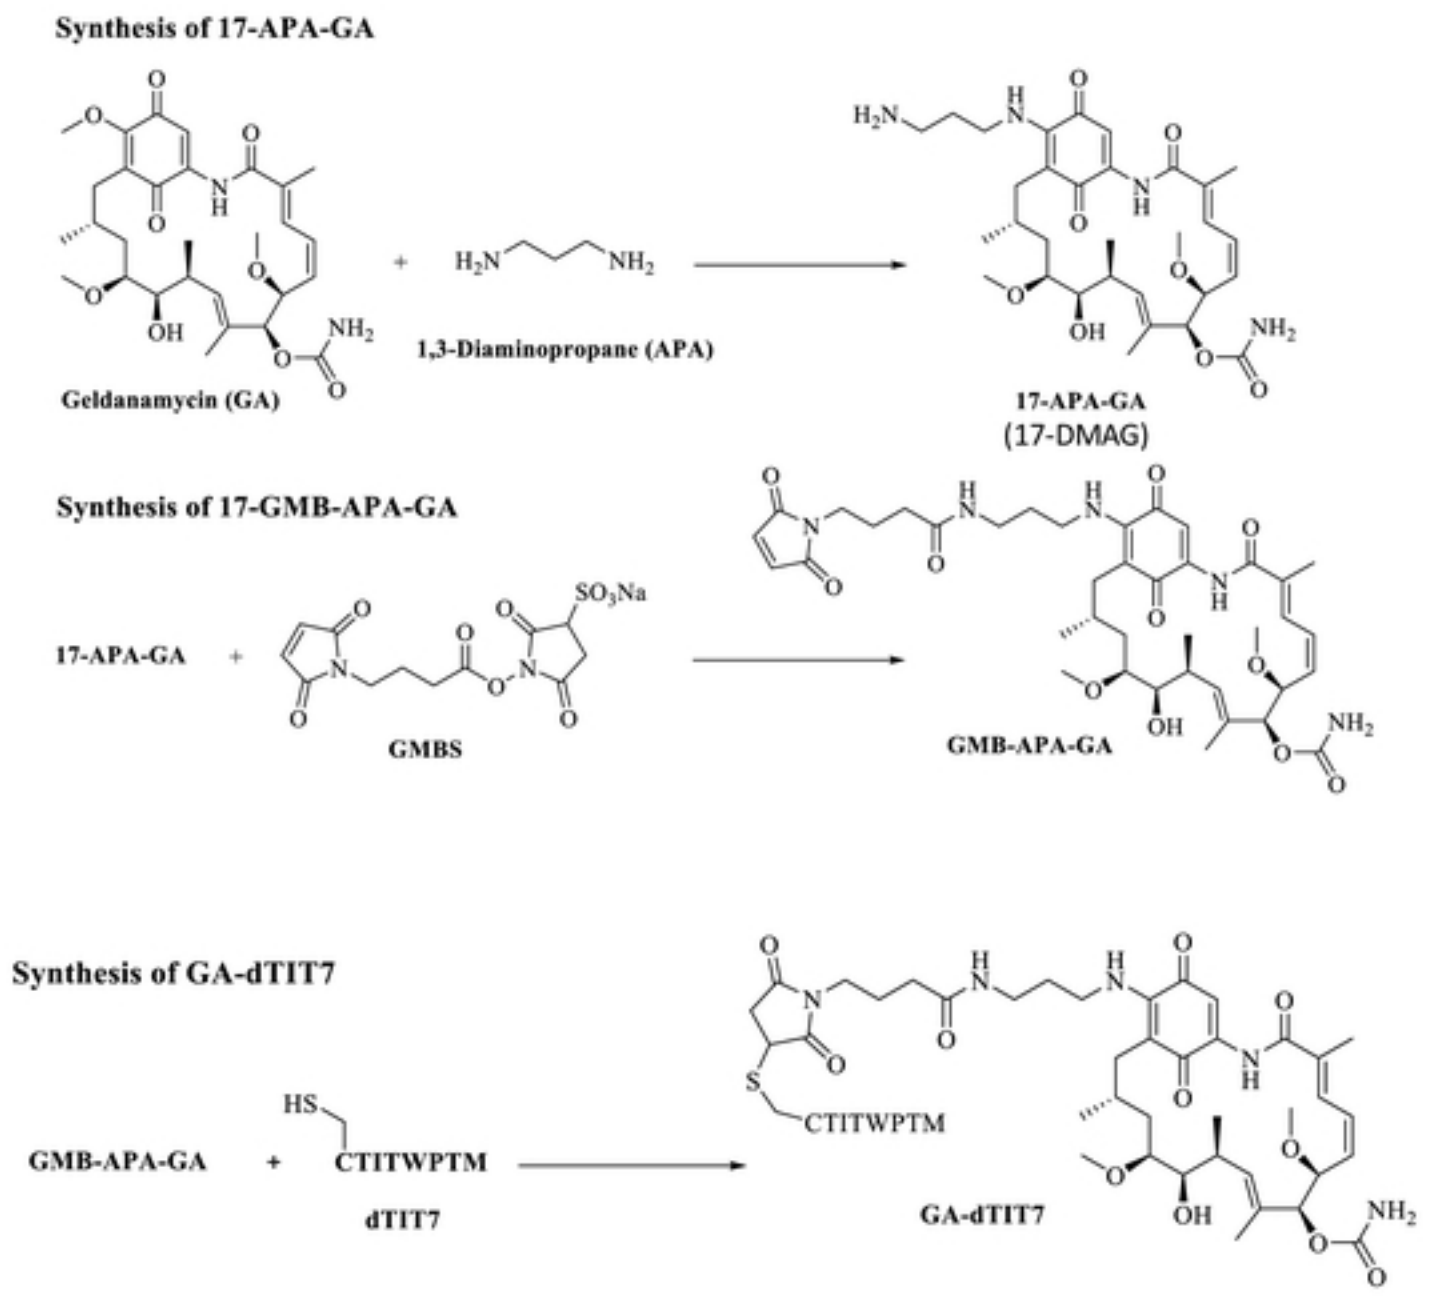

Fig. 5

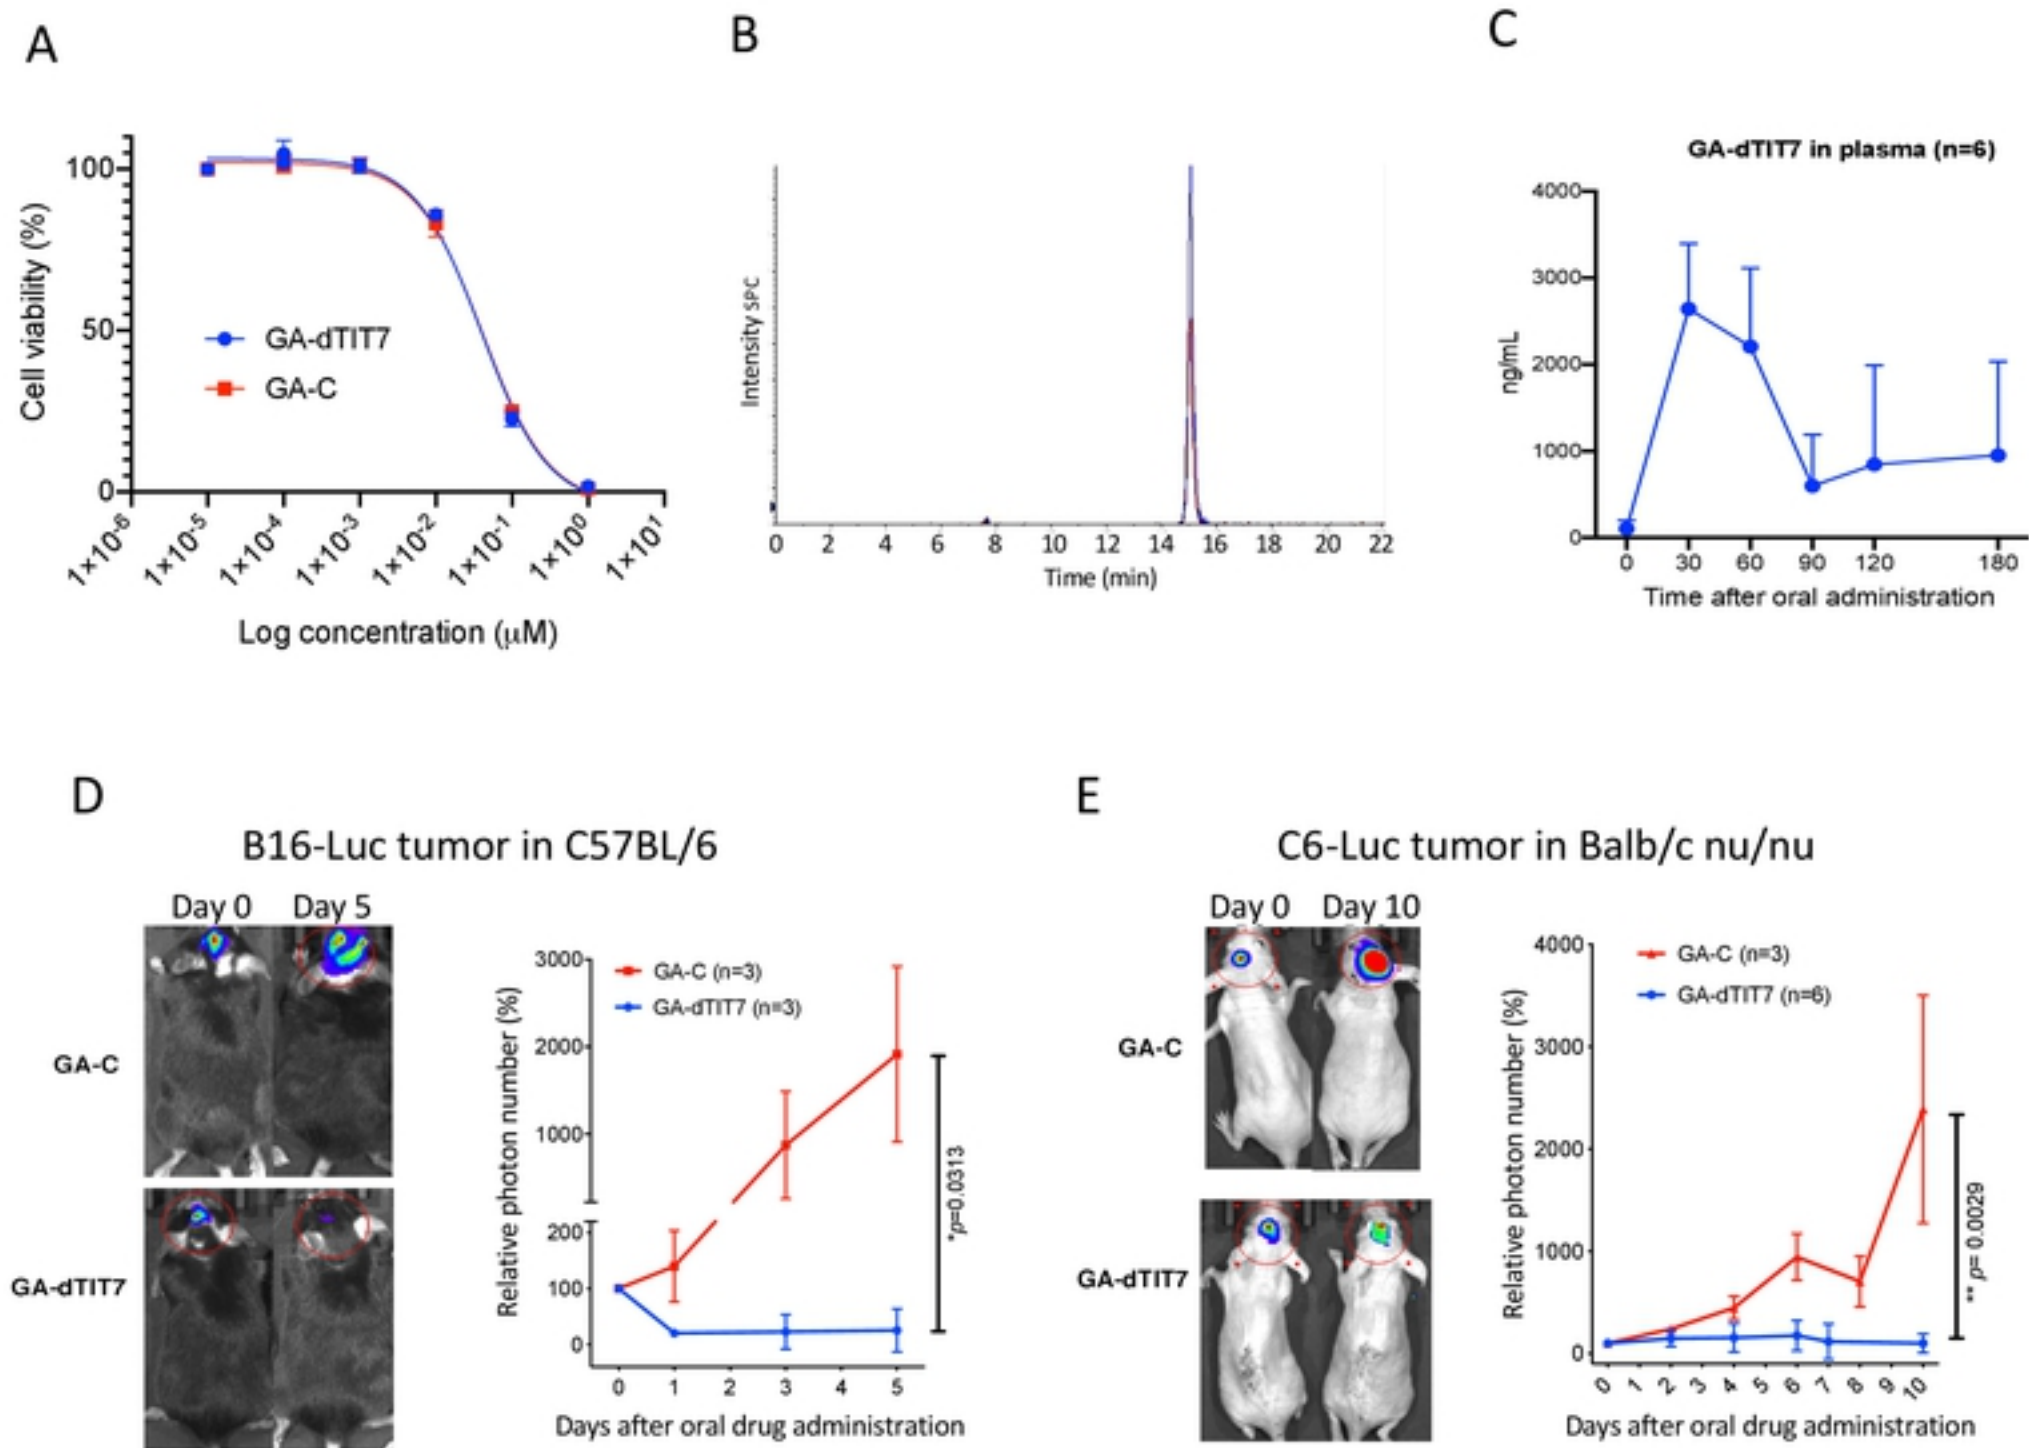

Fig. 6
